# Supplementary material for: Simultaneous bilateral laser therapy accelerates recovery after noise-induced hearing loss in a rat model
Source: PeerJ. 2016 Jul 21;4:e2252. doi: 10.7717/peerj.2252 (PMC4963219; doi:10.7717/peerj.2252)
Supplement: Data S2 [file peerj-04-2252-s002.xlsx]

## Sheet: Group 1
	Baseline ABR								ABR after 9 times of Laser Irradiation
		4 kHz	8 kHz	12 kHz	16 kHz	32 kHz				4 kHz	8 kHz	12 kHz	16 kHz	32 kHz
	RAT1	20	15	20	20	20			RAT1	35	35	40	60	50
	RAT2	20	20	15	30	20			RAT2	50	30	45	70	55
	RAT3	25	10	20	20	25			RAT3	35	30	45	55	45
	RAT4	25	15	35	25	25			RAT4	40	30	55	65	50
	RAT5	15	25	15	15	25			RAT5	Die
	ABR after Noise Exposure								ABR after 12 times of Laser Irradiation
		4 kHz	8 kHz	12 kHz	16 kHz	32 kHz				4 kHz	8 kHz	12 kHz	16 kHz	32 kHz
	RAT1	40	40	55	60	55			RAT1	35	35	40	60	45
	RAT2	45	45	55	65	60			RAT2	40	40	45	65	55
	RAT3	45	40	55	60	55			RAT3	30	35	40	40	45
	RAT4	35	30	60	60	50			RAT4	40	35	60	60	60
	RAT5	35	45	65	65	55			RAT5	Die
	ABR after 3 times of Laser Irradiation								ABR after 14 times of Laser Irradiation
		4 kHz	8 kHz	12 kHz	16 kHz	32 kHz				4 kHz	8 kHz	12 kHz	16 kHz	32 kHz
	RAT1	30	25	55	50	45			RAT1	40	35	40	60	55
	RAT2	50	45	50	60	65			RAT2	45	50	50	50	60
	RAT3	40	30	50	45	55			RAT3	40	30	50	50	50
	RAT4	35	30	65	50	45			RAT4	25	35	55	50	50
	RAT5	Die							RAT5	Die
	ABR after 6 times of Laser Irradiation								ABR after 16 times of Laser Irradiation
		4 kHz	8 kHz	12 kHz	16 kHz	32 kHz				4 kHz	8 kHz	12 kHz	16 kHz	32 kHz
	RAT1	35	40	60	50	45			RAT1	30	30	25	45	30
	RAT2	35	30	50	60	55			RAT2	35	25	20	50	45
	RAT3	40	30	40	50	45			RAT3	35	35	35	45	55
	RAT4	40	30	65	60	45			RAT4	30	30	50	60	40
	RAT5	Die							RAT5	Die

## Sheet: Group 2
	Baseline ABR								ABR after 9 times of Laser Irradiation
		4 kHz	8 kHz	12 kHz	16 kHz	32 kHz				4 kHz	8 kHz	12 kHz	16 kHz	32 kHz
	RAT6	20	15	20	20	20			RAT6	35	45	35	40	50
	RAT7	Die							RAT7	Die
	RAT8	25	10	20	20	25			RAT8	40	45	55	60	55
	RAT9	25	15	35	25	25			RAT9	45	50	50	65	50
	RAT10	15	25	15	15	25			RAT10	50	45	60	65	60
	ABR after Noise Exposure								ABR after 12 times of Laser Irradiation
		4 kHz	8 kHz	12 kHz	16 kHz	32 kHz				4 kHz	8 kHz	12 kHz	16 kHz	32 kHz
	RAT6	55	50	65	60	55			RAT6	35	35	35	35	30
	RAT7	Die							RAT7	Die
	RAT8	65	75	65	65	60			RAT8	35	50	45	35	35
	RAT9	55	65	65	60	55			RAT9	30	35	40	50	45
	RAT10	55	60	60	70	70			RAT10	35	40	55	65	50
	ABR after 3 times of Laser Irradiation								ABR after 15 times of Laser Irradiation
		4 kHz	8 kHz	12 kHz	16 kHz	32 kHz				4 kHz	8 kHz	12 kHz	16 kHz	32 kHz
	RAT6	60	55	55	55	65			RAT6	30	40	35	40	25
	RAT7	Die							RAT7	Die
	RAT8	50	60	60	55	65			RAT8	30	40	40	35	35
	RAT9	65	60	60	60	65			RAT9	30	40	40	35	35
	RAT10	65	55	60	50	65			RAT10	35	40	50	45	55
	ABR after 6 times of Laser Irradiation
		4 kHz	8 kHz	12 kHz	16 kHz	32 kHz
	RAT6	45	55	55	50	60
	RAT7	Die								`
	RAT8	50	60	60	65	60
	RAT9	45	50	55	65	45
	RAT10	55	60	65	60	55

## Sheet: Group 3
		Baseline ABR								ABR after 9 times of Laser Irradiation
			4 kHz	8 kHz	12 kHz	16 kHz	32 kHz				4 kHz	8 kHz	12 kHz	16 kHz	32 kHz
		RAT11	20	20	20	25	20			RAT11	25	30	20	30	35
		RAT12	25	25	20	25	25			RAT12	30	15	15	15	35
		RAT13	25	20	20	15	15			RAT13	30	30	40	40	35
		RAT14	20	25	25	15	20			RAT14	35	40	45	45	40
		RAT15	25	15	20	15	20			RAT15	40	40	50	55	55
		ABR after Noise Exposure								ABR after 12 times of Laser Irradiation
			4 kHz	8 kHz	12 kHz	16 kHz	32 kHz				4 kHz	8 kHz	12 kHz	16 kHz	32 kHz
		RAT11	60	70	50	60	60			RAT11	30	25	25	15	25
		RAT12	55	60	60	70	55			RAT12	20	15	15	15	30
		RAT13	50	60	60	60	70			RAT13	35	20	25	35	35
		RAT14	55	60	55	65	60			RAT14	25	40	30	25	30
		RAT15	50	60	50	60	65			RAT15	30	40	50	50	55
		ABR after 3 times of Laser Irradiation								ABR after 15 times of Laser Irradiation
			4 kHz	8 kHz	12 kHz	16 kHz	32 kHz				4 kHz	8 kHz	12 kHz	16 kHz	32 kHz
		RAT11	45	55	55	45	50			RAT11	20	20	25	15	10
		RAT12	40	55	55	55	45			RAT12	15	20	10	20	10
		RAT13	40	50	55	60	60			RAT13	25	30	15	20	15
		RAT14	40	45	55	55	45			RAT14	20	25	25	30	35
		RAT15	40	55	50	55	55			RAT15	35	30	40	40	45
		ABR after 6 times of Laser Irradiation
			4 kHz	8 kHz	12 kHz	16 kHz	32 kHz
		RAT11	30	25	30	45	20
		RAT12	40	45	40	45	45
		RAT13	55	45	50	60	50
		RAT14	30	50	55	55	55
		RAT15	40	55	55	65	65

## Sheet: Group 4
	Baseline ABR								ABR after 9 times of Laser Irradiation
		4 kHz	8 kHz	12 kHz	16 kHz	32 kHz				4 kHz	8 kHz	12 kHz	16 kHz	32 kHz
	RAT16	10	20	10	15	10			RAT16	25	25	35	40	40
	RAT17	10	10	10	10	10			RAT17	30	35	40	30	50
	RAT18	10	10	10	10	10			RAT18	30	40	45	55	40
	RAT19	15	15	15	15	10			RAT19	25	20	35	40	45
	RAT20	15	10	10	10	10			RAT20	35	35	50	45	50
	ABR after Noise Exposure								ABR after 12 times of Laser Irradiation
		4 kHz	8 kHz	12 kHz	16 kHz	32 kHz				4 kHz	8 kHz	12 kHz	16 kHz	32 kHz
	RAT16	45	45	70	65	65			RAT16	25	25	40	35	35
	RAT17	50	50	65	60	60			RAT17	20	35	25	35	30
	RAT18	45	65	50	55	60			RAT18	25	30	35	45	35
	RAT19	50	55	65	70	55			RAT19	35	25	30	40	45
	RAT20	40	50	55	65	60			RAT20	30	35	35	50	50
	ABR after 3 times of Laser Irradiation								ABR after 15 times of Laser Irradiation
		4 kHz	8 kHz	12 kHz	16 kHz	32 kHz				4 kHz	8 kHz	12 kHz	16 kHz	32 kHz
	RAT16	25	35	65	60	55			RAT16	20	15	20	35	25
	RAT17	40	35	55	65	65			RAT17	25	35	30	30	35
	RAT18	40	50	60	50	60			RAT18	25	40	40	30	40
	RAT19	40	45	50	60	65			RAT19	25	35	35	30	35
	RAT20	55	55	50	60	60			RAT20	40	45	55	55	60
	ABR after 6 times of Laser Irradiation
		4 kHz	8 kHz	12 kHz	16 kHz	32 kHz
	RAT16	30	30	60	55	50
	RAT17	45	55	65	60	55
	RAT18	35	40	60	65	65
	RAT19	40	50	55	65	65
	RAT20	45	55	65	65	65

## Sheet: Group 5
	Baseline ABR								ABR after 9 times of Laser Irradiation
		4 kHz	8 kHz	12 kHz	16 kHz	32 kHz				4 kHz	8 kHz	12 kHz	16 kHz	32 kHz
	RAT21	20	15	15	15	10			RAT21	35	35	30	35	25
	RAT22	20	15	10	10	15			RAT22	40	55	60	60	55
	RAT23	15	10	20	20	15			RAT23	55	50	55	55	60
	RAT24	20	20	15	15	10			RAT24	40	50	50	60	65
	ABR after Noise Exposure								ABR after 12 times of Laser Irradiation
		4 kHz	8 kHz	12 kHz	16 kHz	32 kHz				4 kHz	8 kHz	12 kHz	16 kHz	32 kHz
	RAT21	45	45	70	65	65			RAT21	25	35	30	25	35
	RAT22	50	50	65	60	60			RAT22	30	30	55	55	55
	RAT23	45	65	50	55	60			RAT23	55	50	55	55	70
	RAT24	50	55	65	70	55			RAT24	45	50	55	55	50
	ABR after 3 times of Laser Irradiation								ABR after 15 times of Laser Irradiation
		4 kHz	8 kHz	12 kHz	16 kHz	32 kHz				4 kHz	8 kHz	12 kHz	16 kHz	32 kHz
	RAT21	25	35	65	60	55			RAT21	25	20	25	15	25
	RAT22	40	35	55	65	65			RAT22	35	50	55	55	40
	RAT23	40	50	60	50	60			RAT23	45	40	55	50	45
	RAT24	40	45	50	60	65			RAT24	40	50	45	45	40
	ABR after 6 times of Laser Irradiation
		4 kHz	8 kHz	12 kHz	16 kHz	32 kHz
	RAT21	30	30	60	55	50
	RAT22	45	55	65	60	55
	RAT23	35	40	60	65	65
	RAT24	40	50	55	65	65

## Sheet: Total Data
	Baseline ABR							Baseline ABR							Baseline ABR							ABR after 9 times of Laser Irradiation							ABR after 9 times of Laser Irradiation							ABR after 9 times of Laser Irradiation
		4 kHz	8 kHz	12 kHz	16 kHz	32 kHz			4 kHz	8 kHz	12 kHz	16 kHz	32 kHz			4 kHz	8 kHz	12 kHz	16 kHz	32 kHz			4 kHz	8 kHz	12 kHz	16 kHz	32 kHz			4 kHz	8 kHz	12 kHz	16 kHz	32 kHz			4 kHz	8 kHz	12 kHz	16 kHz	32 kHz
	RAT6	20	15	20	20	20		RAT11	20	20	20	25	20		RAT16	10	20	10	15	10		RAT6	35	45	35	40	50		RAT11	25	30	20	30	35		RAT16	25	25	35	40	40
	RAT7	20	20	15	30	20		RAT12	25	25	20	25	25		RAT17	10	10	10	10	10		RAT7	Die						RAT12	30	15	15	15	35		RAT17	30	35	40	30	50
	RAT8	25	10	20	20	25		RAT13	25	20	20	15	15		RAT18	10	10	10	10	10		RAT8	40	45	55	60	55		RAT13	30	30	40	40	35		RAT18	30	40	45	55	40
	RAT9	25	15	35	25	25		RAT14	20	25	25	15	20		RAT19	15	15	15	15	10		RAT9	45	50	50	65	50		RAT14	35	40	45	45	40		RAT19	25	20	35	40	45
	RAT10	15	25	15	15	25		RAT15	25	15	20	15	20		RAT20	15	10	10	10	10		RAT10	50	45	60	65	60		RAT15	40	40	50	55	55		RAT20	35	35	50	45	50
	ABR after Noise Exposure							ABR after Noise Exposure							ABR after Noise Exposure							ABR after 12 times of Laser Irradiation							ABR after 12 times of Laser Irradiation							ABR after 12 times of Laser Irradiation
		4 kHz	8 kHz	12 kHz	16 kHz	32 kHz			4 kHz	8 kHz	12 kHz	16 kHz	32 kHz			4 kHz	8 kHz	12 kHz	16 kHz	32 kHz			4 kHz	8 kHz	12 kHz	16 kHz	32 kHz			4 kHz	8 kHz	12 kHz	16 kHz	32 kHz			4 kHz	8 kHz	12 kHz	16 kHz	32 kHz
	RAT6	55	50	65	60	55		RAT11	60	70	50	60	60		RAT16	45	45	70	65	65		RAT6	35	35	35	35	30		RAT11	30	25	25	15	25		RAT16	25	25	40	35	35
	RAT7	60	60	75	55	65		RAT12	55	60	60	70	55		RAT17	50	50	65	60	60		RAT7	Die						RAT12	20	15	15	15	30		RAT17	20	35	25	35	30
	RAT8	65	75	65	65	60		RAT13	50	60	60	60	70		RAT18	45	65	50	55	60		RAT8	35	50	45	35	35		RAT13	35	20	25	35	35		RAT18	25	30	35	45	35
	RAT9	55	65	65	60	55		RAT14	55	60	55	65	60		RAT19	50	55	65	70	55		RAT9	30	35	40	50	45		RAT14	25	40	30	25	30		RAT19	35	25	30	40	45
	RAT10	55	60	60	70	70		RAT15	50	60	50	60	65		RAT20	40	50	55	65	60		RAT10	35	40	55	65	50		RAT15	30	40	50	50	55		RAT20	30	35	35	50	50
	ABR after 3 times of Laser Irradiation							ABR after 3 times of Laser Irradiation							ABR after 3 times of Laser Irradiation							ABR after 15 times of Laser Irradiation							ABR after 15 times of Laser Irradiation							ABR after 15 times of Laser Irradiation
		4 kHz	8 kHz	12 kHz	16 kHz	32 kHz			4 kHz	8 kHz	12 kHz	16 kHz	32 kHz			4 kHz	8 kHz	12 kHz	16 kHz	32 kHz			4 kHz	8 kHz	12 kHz	16 kHz	32 kHz			4 kHz	8 kHz	12 kHz	16 kHz	32 kHz			4 kHz	8 kHz	12 kHz	16 kHz	32 kHz
	RAT6	60	55	55	55	65		RAT11	45	55	55	45	50		RAT16	25	35	65	60	55		RAT6	30	40	35	40	25		RAT11	20	20	25	15	10		RAT16
	RAT7	65	65	65	65	65		RAT12	40	55	55	55	45		RAT17	40	35	55	65	65		RAT7	Die						RAT12	15	20	10	20	10		RAT17
	RAT8	50	60	60	55	65		RAT13	40	50	55	60	60		RAT18	40	50	60	50	60		RAT8	30	40	40	35	35		RAT13	25	30	15	20	15		RAT18
	RAT9	65	60	60	60	65		RAT14	40	45	55	55	45		RAT19	40	45	50	60	65		RAT9	30	40	40	35	35		RAT14	20	25	25	30	35		RAT19
	RAT10	65	55	60	50	65		RAT15	40	55	50	55	55		RAT20	55	55	50	60	60		RAT10	35	40	50	45	55		RAT15	35	30	40	40	45		RAT20
	ABR after 6 times of Laser Irradiation							ABR after 6 times of Laser Irradiation							ABR after 6 times of Laser Irradiation
		4 kHz	8 kHz	12 kHz	16 kHz	32 kHz			4 kHz	8 kHz	12 kHz	16 kHz	32 kHz			4 kHz	8 kHz	12 kHz	16 kHz	32 kHz
	RAT6	45	55	55	50	60		RAT11	30	25	30	45	20		RAT16	30	30	60	55	50
	RAT7	45	55	50	50	55		RAT12	40	45	40	45	45		RAT17	45	55	65	60	55
	RAT8	50	60	60	65	60		RAT13	55	45	50	60	50		RAT18	35	40	60	65	65
	RAT9	45	50	55	65	45		RAT14	30	50	55	55	55		RAT19	40	50	55	65	65
	RAT10	55	60	65	60	55		RAT15	40	55	55	65	65		RAT20	45	55	65	65	65
	Total Data
	4 kHz								16 kHz
		Base	Noise	3rd	6th	9th	12th			Base	Noise	3rd	6th	9th	12th
	Bilateral	17	53	42	38	29	26		Bilateral	19	63	56	51	31	27
	Unilateral	24	53.33	45.83	42.5	34.16	30.83		Unilateral	16.66	62.5	56.66	62.5	50.83	38.33
	Control	18.33	48.33	53.33	46.66	41.66	31.66		Control	13.33	65	55	63.33	55	55
	8 kHz								32 kHz
		Base	Noise	3rd	6th	9th	12th			Base	Noise	3rd	6th	9th	12th
	Bilateral	18	55	47	42	30	27		Bilateral	17	59	56	46	42	30
	Unilateral	15.83	63.33	51.66	49.16	37.5	33.33		Unilateral	17.5	60	60	56.66	44.16	37.5
	Control	16.66	56.66	55	56.66	40	38.33		Control	18.33	65	60	61.66	55	51.66
	12 kHz
		Base	Noise	3rd	6th	9th	12th
	Bilateral	16	62	57	50	29	28
	Unilateral	20.83	60	56.66	55.83	45	34.16
	Control	18.33	55	53.33	61.66	53.33	46.66

## Sheet: Statistics
			ABR Measuremnt for Baseline								ABR Measuremnt for Baseline
			4	8	12	16	32				4	8	12	16	32
			20	15	20	20	20				55	50	65	60	55
			20	20	20	25	20				60	70	50	60	60
			25	25	20	25	25				55	60	60	70	55
			10	20	10	15	10				45	45	70	65	65
			10	10	10	10	10				50	50	65	60	60
			20	15	15	15	10				45	45	70	65	65
			25	10	20	20	25				65	75	65	65	60
			25	15	35	25	25				55	65	65	60	55
			25	20	20	15	15				50	60	60	60	70
			20	25	25	15	20				55	60	55	65	60
			10	10	10	10	10				45	65	50	55	60
			15	10	10	10	10				50	55	65	70	55
			15	25	15	15	25				55	60	60	70	70
			25	15	20	15	20				50	60	50	60	65
			15	10	10	10	10				40	50	55	65	60
			20	15	10	10	15				50	50	65	60	60
			15	10	20	20	15				45	65	50	55	60
			20	20	15	15	10				50	55	65	70	55
		Mean	18.61	16.11	16.94	16.11	16.39			Mean	51.11	57.78	60.28	63.06	60.56
		SD	5.37	5.57	6.67	5.3	6.14			SD	6.08	8.44	6.96	4.89	4.82
